# Supplementary material for: Comparative Study of Sulfides from Porphyry, Skarn, and Carbonate-Replacement Mineralization at the Recsk Porphyry-Mineralized Complex, Hungary
Source: MDPI journal article supplement (doi:10.3390/min14090956), 2024-09-21
Supplement: s1 [file s1]

## Sheet: Detection limits
Element	Det.lim. (ppm)	Element	Det.lim. (ppm)	Element	Det.lim. (ppm)
Se	164-183	Sn	98-127	V	62-78
S	61-109	In	433-455	Hg	230-237
Te	230-357	Mn	72-74	Re	289-295
Sb	104-163	Cu	125-221	Mo	253-271
As	229-245	Cd	173-202	Ag	113-145
Fe	74-131	Ge	87-98	W	187-210
Zn	235-336	Pb	381-488	Bi	200-412

## Sheet: Measurement cond.
Measurement Condition Sulfosalt
WDS elements
	Element	X-ray	Crystal	CH	Acc.v	PeakPos.	(nm)	BG_L	BG_U
	Se	La	TAP	(2)	20.0	97.539	0.89900	5.000	5.000
	Pb	Ma	PETJ	(3)	20.0	169.143	0.52860	4.000	4.000
	Ag	La	PETH	(4)	20.0	132.735	0.41544	5.000	5.000
	Cu	Ka	LIFH	(5)	20.0	107.345	0.15406	5.000	5.000
	S	Ka	PETJ	(3)	20.0	171.970	0.53722	5.000	5.000
	Bi	Ma	PETH	(4)	20.0	163.670	0.51180	4.000	2.000
	Te	La	PETJ	(3)	20.0	105.084	0.32892	5.000	2.500
	Sb	La	PETH	(4)	20.0	109.752	0.34394	2.000	2.000
	Element	Peak	Back	Pksk	Gain	High.V	Base.L	Window.W	Mode
	Se	40.0	20.0(s)	1	16	1648	1.5	-	(V)	Int
	Pb	20.0	10.0(s)	1	64	1738	2.0	-	(V)	Int
	Ag	40.0	20.0(s)	1	64	1700	0.7	-	(V)	Int
	Cu	40.0	20.0(s)	1	32	1720	1.5	-	(V)	Int
	S	20.0	10.0(s)	1	32	1800	0.5	-	(V)	Int
	Bi	20.0	10.0(s)	1	64	1750	1.5	-	(V)	Int
	Te	40.0	20.0(s)	1	64	1710	1.5	4.5	(V)	Dif
	Sb	40.0	20.0(s)	1	64	1708	1.5	-	(V)	Int
Measurement Order of WDS
	Order	Channel1	2	3	4	5
	1	-	Se	PbS	AgLPETH	Cu5LIFH
	2	-	-	S	BiMaPET4	-
	3	-	-	TeLPET3	Sb	-
Standard Data
	Element	Standard_name	Mass(%)	ZAF_Fac.	Z	A	F
	Se	AgBiSe2_20KV	33.2500	5.174	12.995	0.3982	1.0000
	Pb	GALENA20NEW	86.6000	3.6519	5.2663	0.6935	1.0000
	Ag	AgBiSe2_20KV	22.7200	1.7661	3.0371	0.5815	1.0000
	Cu	CuFeS220_2P3	34.6200	0.2352	0.2486	0.9465	1.0000
	S	GALENA20NEW	13.4000	3.6771	5.3694	0.6848	1.0000
	Bi	AgBiSe2_20KV	44.0300	2.8385	4.8249	0.5883	1.0000
	Te	Bi2Te3LB20kV	47.6800	1.3058	1.9189	0.6805	1.0000
	Sb	SbTeLB20kv	38.8800	1.6941	2.0429	0.8293	1.0000
Standard Intensity of WDS
	Element	Curr.(A)	Net(cps)	Bg-(cps)	Bg+(cps)	S.D.(%)	Date
	Se	9.999E-09	1850.5	41.4	26.2	0.31	Jan	16	20:18	2023
	Pb	9.999E-09	1374.3	22.1	11.4	0.61	Jan	16	20:00	2023
	Ag	9.999E-09	2511.8	62.2	41.3	0.46	Jan	16	20:18	2023
	Cu	9.999E-09	5089.4	91.9	72.5	0.32	Jan	16	20:09	2023
	S	9.999E-09	1160.7	23.5	8.7	0.67	Jan	16	20:00	2023
	Bi	9.999E-09	1828.3	56.9	35.2	0.54	Jan	16	20:18	2023
	Te	1.085E-08	2495.8	39.9	36.7	0.32	Jan	24	00:58	2023
	Sb	1.089E-08	8398.3	171.4	135.9	0.25	Jan	23	23:53	2023
Measurement Condition Sphalerite
WDS elements
	Element	X-ray	Crystal	CH	Acc.v	PeakPos.	(nm)	BG_L	BG_U
	Ge	La	TAP	(2)	20.0	113.343	1.04361	5.000	1.700
	S	Ka	PETJ	(3)	20.0	172.002	0.53722	5.000	5.000
	Zn	Ka	LIFH	(4)	20.0	99.622	0.14352	6.300	6.300
	Hg	Ma	PETH	(5)	20.0	180.559	0.56476	5.000	5.000
	V	Ka	PETJ	(3)	20.0	79.740	0.25036	5.000	5.000
	Fe	Ka	LIFH	(4)	20.0	134.573	0.19360	5.000	5.000
	In	La	PETH	(5)	20.0	120.548	0.37719	1.500	1.500
	Mn	Ka	PETJ	(3)	20.0	66.705	0.21018	3.500	5.000
	Cu	Ka	LIFH	(4)	20.0	106.931	0.15406	5.000	5.000
	Cd	Lb	PETH	(5)	20.0	119.511	0.37382	3.500	3.500
	Element	Peak	Back	Pksk	Gain	High.V	Base.L	Window.W	Mode
	Ge	60.0	30.0(s)	1	16	1666	0.7	-	(V)	Int
	S	20.0	10.0(s)	1	32	1800	0.5	-	(V)	Int
	Zn	20.0	10.0(s)	1	32	1750	2.0	-	(V)	Int
	Hg	40.0	20.0(s)	1	64	1700	0.7	-	(V)	Int
	V	60.0	30.0(s)	1	16	1670	0.7	-	(V)	Int
	Fe	60.0	30.0(s)	1	32	1700	0.7	-	(V)	Int
	In	60.0	30.0(s)	1	64	1700	0.7	-	(V)	Int
	Mn	60.0	30.0(s)	1	32	1758	1.5	-	(V)	Int
	Cu	60.0	30.0(s)	1	32	1720	1.5	-	(V)	Int
	Cd	60.0	30.0(s)	1	64	1700	0.7	-	(V)	Int
Measurement Order of WDS
	Order	Channel1	2	3	4	5
	1	-	Ge	S	ZnCabr21	Hg1TU
	2	-	-	V_2PETJ	Fe4LIFHn	In
	3	-	-	Mn3PETJ	Cu4LIFH	Cd_TU3
Standard Data
	Element	Standard_name	Mass(%)	ZAF_Fac.	Z	A	F
	Ge	Ge20_ex_metall	100.0000	7.8988	15.5581	0.5077	1.0000
	S	SPIsphal20new	32.9100	2.6424	4.4849	0.5892	1.0000
	Zn	SPIsphal20new	67.0700	0.1931	0.1972	0.9793	1.0000
	Hg	Cinnabar20KV	86.2200	4.0165	5.9746	0.6723	1.0000
	V	V_metal20_ext	100.0000	0.9447	0.9887	0.9556	1.0000
	Fe	CuFeS220_2P3	30.4300	0.4891	0.4902	0.9522	1.0480
	In	Indium20_ex	100.0000	1.9604	2.4020	0.8162	1.0000
	Mn	Rhod20KV	25.6036	0.5481	0.5723	0.9578	1.0000
	Cu	CuFeS220_2P3	34.6200	0.2352	0.2486	0.9465	1.0000
	Cd	Cadmium20kV	100.0000	1.9657	2.3712	0.8290	1.0000
Measurement Conditions Kesterite
WDS elements
	Element	X-ray	Crystal	CH	Acc.v	PeakPos.	(nm)	BG_L	BG_U
	Se	La	TAP	(2)	20.0	97.549	0.89900	5.000	5.000
	S	Ka	PETJ	(3)	20.0	171.994	0.53722	5.000	5.000
	Zn	Ka	LIFH	(4)	20.0	99.622	0.14352	6.300	6.300
	In	La	PETH	(5)	20.0	120.548	0.37719	1.500	1.500
	V	Ka	PETJ	(3)	20.0	79.740	0.25036	5.000	5.000
	Fe	Ka	LIFH	(4)	20.0	134.500	0.19360	5.000	5.000
	Cd	Lb	PETH	(5)	20.0	119.511	0.37382	1.500	1.500
	Mn	Ka	PETJ	(3)	20.0	66.705	0.21018	3.500	5.000
	Cu	Ka	LIFH	(4)	20.0	106.953	0.15406	5.000	5.000
	Sn	La	PETH	(5)	20.0	115.205	0.35999	5.000	5.000
	Element	Peak	Back	Pksk	Gain	High.V	Base.L	Window.W	Mode
	Se	40.0	20.0(s)	1	16	1648	1.5	-	(V)	Int
	S	20.0	10.0(s)	1	32	1800	0.5	-	(V)	Int
	Zn	20.0	10.0(s)	1	32	1750	2.0	-	(V)	Int
	In	60.0	30.0(s)	1	64	1700	0.7	-	(V)	Int
	V	40.0	20.0(s)	1	16	1670	0.7	-	(V)	Int
	Fe	40.0	20.0(s)	1	32	1700	0.7	-	(V)	Int
	Cd	60.0	30.0(s)	1	64	1700	0.7	-	(V)	Int
	Mn	60.0	30.0(s)	1	32	1758	1.5	-	(V)	Int
	Cu	20.0	10.0(s)	1	32	1720	1.5	-	(V)	Int
	Sn	40.0	20.0(s)	1	64	1740	1.5	-	(V)	Int
Measurement Order of WDS
	Order	Channel1	2	3	4	5
	1	-	Se	S	ZnCabr21	In
	2	-	-	V_2PETJ	Fe4LIFHn	Cd_TU3
	3	-	-	Mn3PETJ	Cu4LIFH	Sn
Standard Data
	Element	Standard_name	Mass(%)	ZAF_Fac.	Z	A	F
	Se	AgBiSe2_20KV	33.2500	5.1741	12.9951	0.3982	1.0000
	S	CuFeS220_2P3	34.9400	2.8983	4.4575	0.6498	1.0007
	Zn	SPIsphal20new	67.0700	0.1931	0.1972	0.9793	1.0000
	In	Indium20_ex	100.0000	1.9604	2.4020	0.8162	1.0000
	V	V_metal20_ext	100.0000	0.9447	0.9887	0.9556	1.0000
	Fe	CuFeS220_2P3	30.4300	0.4891	0.4902	0.9522	1.0480
	Cd	Cadmium20kV	100.0000	1.9657	2.3712	0.8290	1.0000
	Mn	Rhod20KV	25.6036	0.5481	0.5723	0.9578	1.0000
	Cu	CuFeS220_2P3	34.6200	0.2352	0.2486	0.9465	1.0000
	Sn	PtSnCabri20kV	37.8200	1.4261	2.3157	0.6158	1.0000
Standard Intensity of WDS
	Element	Curr.(A)	Net(cps)	Bg-(cps)	Bg+(cps)	S.D.(%)	Date
	Se	1.046E-08	1847.4	43.0	25.4	0.31	Feb	9	15:19	2023
	S	1.071E-08	2553.7	4.3	3.8	0.44	Feb	9	15:34	2023
	Zn	1.035E-08	7678.9	85.2	81.8	0.26	Feb	6	18:15	2023
	In	1.034E-08	3157.1	82.2	58.7	0.41	Feb	6	17:34	2023
	V	1.035E-08	21942.3	97.8	43.0	0.15	Feb	6	17:50	2023
	Fe	1.071E-08	4720.7	38.1	29.7	0.33	Feb	9	15:34	2023
	Cd	1.031E-08	8008.5	144.0	127.2	0.15	Feb	6	17:11	2023
	Mn	1.035E-08	6870.1	85.7	52.4	0.27	Feb	6	18:08	2023
	Cu	1.071E-08	4614.0	73.8	56.1	0.33	Feb	9	15:34	2023
	Sn	1.064E-08	6226.2	150.2	105.8	0.17	Feb	9	15:27	2023
Measurement Condition Molybdenite
WDS elements
	Element	X-ray	Crystal	CH	Acc.v	PeakPos.	(nm)	BG_L	BG_U
	Se	La	TAP	(2)	20.0	97.564	0.89900	5.000	5.000
	S	Ka	PETJ	(3)	20.0	172.006	0.53722	5.000	5.000
	Mo	La	PETH	(4)	20.0	172.979	0.54066	5.000	5.000
	Cu	Ka	LIFH	(5)	20.0	107.371	0.15406	5.000	5.000
	W	Ma	TAP	(2)	20.0	75.515	0.69830	4.000	4.000
	Re	La	LIFH	(5)	20.0	99.878	0.14329	6.000	6.000
	Element	Peak	Back	Pksk	Gain	High.V	Base.L	Window.W	Mode
	Se	40.0	20.0(s)	1	16	1648	1.5	-	(V)	Int
	S	20.0	10.0(s)	1	32	1800	0.5	-	(V)	Int
	Mo	20.0	10.0(s)	1	64	1700	1.5	-	(V)	Int
	Cu	60.0	30.0(s)	1	32	1720	1.5	-	(V)	Int
	W	60.0	30.0(s)	1	16	1666	0.7	-	(V)	Int
	Re	60.0	30.0(s)	1	32	1700	0.7	-	(V)	Int
Measurement Order of WDS
	Order	Channel1	2	3	4	5
	1	-	Se	S	PETH4Mo	Cu5LIFH
	2	-	W_M2TAP	-	-	Re
Standard Data
	Element	Standard_name	Mass(%)	ZAF_Fac.	Z	A	F
	Se	AgBiSe2_20KV	33.2500	5.1741	12.9951	0.3982	1.0000
	S	Molyb_20_P2	40.0600	3.5848	4.5640	0.7855	1.0000
	Mo	Molyb_20_P2	59.8600	3.4598	4.4221	0.7824	1.0000
	Cu	CuFeS220_2P3	34.6200	0.2352	0.2486	0.9465	1.0000
	W	Wmet20kv	100.0000	5.4451	9.4713	0.5749	1.0000
	Re	Re_metal20_ext	100.0000	0.1811	0.1897	0.9544	1.0000
Standard Intensity of WDS
	Element	Curr.(A)	Net(cps)	Bg-(cps)	Bg+(cps)	S.D.(%)	Date
	Se	1.044E-08	1897.1	37.7	25.4	0.30	Jan	31	14:39	2023
	S	1.028E-08	3628.6	9.8	6.4	0.37	Jan	31	14:10	2023
	Mo	1.028E-08	3509.2	32.2	16.1	0.38	Jan	31	14:10	2023
	Cu	1.037E-08	5315.6	93.6	70.3	0.31	Jan	31	14:18	2023
	W	1.042E-08	8064.5	189.4	103.3	0.15	Jan	31	14:31	2023
	Re	1.012E-08	7107.1	328.0	248.5	0.28	Jan	31	14:01	2023
Measurement Condition Galena
WDS elements
	Element	X-ray	Crystal	CH	Acc.v	PeakPos.	(nm)	BG_L	BG_U
	Se	La	TAP	(2)	20.0	97.546	0.89900	5.000	5.000
	Pb	Ma	PETJ	(3)	20.0	169.151	0.52860	4.000	4.000
	Ag	La	PETH	(4)	20.0	132.741	0.41544	5.000	5.000
	Cu	Ka	LIFH	(5)	20.0	107.390	0.15406	5.000	5.000
	Bi	Ma	PETJ	(3)	20.0	163.794	0.51180	5.000	5.000
	S	Ka	PETH	(4)	20.0	171.884	0.53722	4.000	4.000
	Element	Peak	Back	Pksk	Gain	High.V	Base.L	Window.W	Mode
	Se	40.0	20.0(s)	1	16	1676	1.5	-	(V)	Int
	Pb	20.0	10.0(s)	1	64	1738	2.0	-	(V)	Int
	Ag	60.0	30.0(s)	1	64	1700	0.7	-	(V)	Int
	Cu	60.0	30.0(s)	1	32	1720	1.5	-	(V)	Int
	Bi	10.0	30.0(s)	1	64	1680	0.7	-	(V)	Int
	S	20.0	10.0(s)	1	64	1770	1.5	-	(V)	Int
Measurement Order of WDS
	Order	Channel1	2	3	4	5
	1	-	Se	PbS	AgLPETH	Cu5LIFH
	2	-	-	Bi	S	-
Standard Data
	Element	Standard_name	Mass(%)	ZAF_Fac.	Z	A	F
	Se	AgBiSe2_20KV	33.2500	5.1741	12.9951	0.3982	1.0000
	Pb	GALENA20NEW	86.6000	3.6519	5.2663	0.6935	1.0000
	Ag	AgBiSe2_20KV	22.7200	1.7661	3.0371	0.5815	1.0000
	Cu	CuFeS220_2P3	34.6200	0.2352	0.2486	0.9465	1.0000
	Bi	AgBiSe2_20KV	44.0300	2.8385	4.8249	0.5883	1.0000
	S	GALENA20NEW	13.4000	3.6771	5.3694	0.6848	1.0000
Standard Intensity of WDS
	Element	Curr.(A)	Net(cps)	Bg-(cps)	Bg+(cps)	S.D.(%)	Date
	Se	1.013E-08	1900.6	42.1	24.9	0.52	Jan	12	17:11	2023
	Pb	1.009E-08	1394.6	21.9	11.5	0.61	Jan	12	17:54	2023
	Ag	1.013E-08	2515.9	61.1	45.6	0.46	Jan	12	17:11	2023
	Cu	1.014E-08	5126.2	88.6	75.4	0.32	Jan	12	17:05	2023
	Bi	1.013E-08	640.3	15.2	8.4	0.90	Jan	12	17:11	2023
	S	1.009E-08	3147.2	81.7	24.9	0.41	Jan	12	17:54	2023
Measurement Condition Tetrahedrite Group
WDS elements
	Element	X-ray	Crystal	CH	Acc.v	PeakPos.	(nm)	BG_L	BG_U
	As	La	TAP	(2)	20.0	104.993	0.96709	4.000	4.000
	Te	La	PETJ	(3)	20.0	105.099	0.32892	5.000	2.000
	Cu	Ka	LIFH	(4)	20.0	106.915	0.15406	5.000	5.000
	Ag	La	PETH	(5)	20.0	132.901	0.41544	4.000	4.000
	Se	La	TAP	(2)	20.0	97.569	0.89900	4.500	3.500
	Pb	Ma	PETJ	(3)	20.0	169.143	0.52860	4.000	4.000
	Fe	Ka	LIFH	(4)	20.0	134.517	0.19360	5.000	5.000
	Hg	Ma	PETH	(5)	20.0	180.603	0.56476	5.000	5.000
	Bi	Ma	PETJ	(3)	20.0	163.782	0.51180	2.000	2.000
	Zn	Ka	LIFH	(4)	20.0	99.598	0.14352	5.000	5.000
	Cd	Lb	PETH	(5)	20.0	119.510	0.37382	1.500	1.500
	Sb	La	PETH	(5)	20.0	110.061	0.34394	2.000	2.000
	S	Ka	PETH	(5)	20.0	171.844	0.53722	5.000	5.000
	Element	Peak	Back	Pksk	Gain	High.V	Base.L	Window.W	Mode
	As	20.0	10.0(s)	1	32	1640	0.7	-	(V)	Int
	Te	40.0	20.0(s)	1	64	1690	1.5	-	(V)	Int
	Cu	20.0	10.0(s)	1	32	1720	1.5	-	(V)	Int
	Ag	40.0	20.0(s)	1	32	1850	0.7	-	(V)	Int
	Se	40.0	20.0(s)	1	16	1648	1.5	-	(V)	Int
	Pb	40.0	20.0(s)	1	64	1738	2.0	-	(V)	Int
	Fe	20.0	10.0(s)	1	32	1700	0.7	-	(V)	Int
	Hg	40.0	20.0(s)	1	64	1700	0.7	-	(V)	Int
	Bi	40.0	20.0(s)	1	64	1680	0.7	-	(V)	Int
	Zn	20.0	10.0(s)	1	32	1750	2.0	-	(V)	Int
	Cd	40.0	20.0(s)	1	64	1700	0.7	-	(V)	Int
	Sb	20.0	10.0(s)	1	64	1704	1.5	-	(V)	Int
	S	20.0	10.0(s)	1	32	1700	0.5	-	(V)	Int
Measurement Order of WDS
	Order	Channel1	2	3	4	5
	1	-	AsLTAP2	Te3TU	Cu4LIFH	Ag5TU
	2	-	Se	PbS	Fe4LIFHn	Hg1TU
	3	-	-	Bi	ZnCabr21	Cd_TU3
	4	-	-	-	-	Sb
	5	-	-	-	-	S
Standard Data
	Element	Standard_name	Mass(%)	ZAF_Fac.	Z	A	F
	As	PtAs2LB20KV	43.4400	6.1809	14.7721	0.4184	1.0000
	Te	Bi2Te3LB20kV	47.6800	1.3058	1.9189	0.6805	1.0000
	Cu	CuSDutri20kvLB	66.4600	0.2448	0.2510	0.9751	1.0000
	Ag	AgBiSe2_20KV	22.7200	1.7661	3.0371	0.5815	1.0000
	Se	AgBiSe2_20KV	33.2500	5.1741	12.9951	0.3982	1.0000
	Pb	GALENA20NEW	86.6000	3.6519	5.2663	0.6935	1.0000
	Fe	CuFeS220_2P3	30.4300	0.4891	0.4902	0.9522	1.0480
	Hg	Cinnabar20KV	86.2200	4.0165	5.9746	0.6723	1.0000
	Bi	AgBiSe2_20KV	44.0300	2.8385	4.8249	0.5883	1.0000
	Zn	SPIsphal20new	67.0700	0.1931	0.1972	0.9793	1.0000
	Cd	Cadmium20kV	100.0000	1.9657	2.3712	0.8290	1.0000
	Sb	StibniteLb20	71.6800	1.4710	1.8519	0.7943	1.0000
	S	CuFeS220_2P3	34.9400	2.8983	4.4575	0.6498	1.0007
Standard Intensity of WDS
	Element	Curr.(A)	Net(cps)	Bg-(cps)	Bg+(cps)	S.D.(%)	Date
	As	1.001E-08	2417.5	51.0	21.4	0.46	Feb	20	20:39	2023
	Te	1.076E-08	2444.2	40.3	33.8	0.32	Feb	13	19:00	2023
	Cu	9.994E-09	8856.2	73.5	58.5	0.24	Feb	20	23:32	2023
	Ag	1.074E-08	2905.4	73.0	53.7	0.24	Feb	13	18:42	2023
	Se	1.074E-08	1874.4	42.0	25.6	0.30	Feb	13	18:42	2023
	Pb	1.076E-08	1468.2	21.5	11.9	0.59	Feb	13	19:11	2023
	Fe	1.064E-08	4724.4	38.1	34.1	0.33	Feb	20	20:11	2023
	Hg	1.076E-08	2924.8	49.2	16.9	0.42	Feb	13	19:29	2023
	Bi	1.074E-08	680.2	15.5	9.7	0.87	Feb	13	18:42	2023
	Zn	1.000E-08	7513.5	91.8	74.4	0.26	Feb	20	21:29	2023
	Cd	1.053E-08	8993.8	161.5	143.6	0.14	Feb	13	17:13	2023
	Sb	9.997E-09	12725.1	143.2	135.8	0.20	Feb	20	21:55	2023
	S	1.064E-08	6744.1	16.0	9.1	0.27	Feb	20	20:11	2023

## Sheet: Moly w%
No.	Se	S	Mo	Cu	W	Re	Total	Sample code - grain nr.
CAR	0.023	40.22	57.598	0.035	0	0	97.876	3407moly-7
CAR	0.058	40.187	57.306	0.04	0	0	97.591	3407moly-10
CAR	0.037	39.525	57.368	0.007	0	0.003	96.94	3407moly-8
CAR	0	40.211	56.552	0.03	0	0.02	96.813	34072moly-2
CAR	0.11	39.493	55.116	0.075	0	0.024	94.818	3407moly-3
CAR	0.076	40.446	56.483	0.033	0.021	0.035	97.094	3407moly-6
CAR	0.07	38.936	55.945	0.001	0	0.046	94.998	3407moly-5
CAR	0.075	38.281	56.851	0.013	0	0.046	95.266	34072moly-1
CAR	0.094	38.202	55.877	0.03	0	0.056	94.259	3407moly-9
CAR	0.058	39.913	54.33	0.011	0	0.079	94.391	3407moly-2
CAR	0.079	40.388	57.863	0.036	0	0.083	98.449	3407moly-4
CAR	0.097	40.947	53.292	0.134	0.03	0.093	94.593	3407moly-11
CAR	0.06	39.419	55.992	0.025	0	0.125	95.621	3407moly-1
PO	0.005	40.218	55.79	0.006	0	0	96.019	3524moly-1
PO	0	40.872	54.382	0	0	0.001	95.255	3524moly-2
PO	0	39.297	55.853	0.015	0	0.005	95.17	3513moly-1
PO	0.024	40.582	55.836	0.021	0	0.005	96.468	3513moly-7
PO	0.142	40.723	57.445	0.001	0	0.006	98.317	3521moly-2
PO	0.09	40.665	56.739	0	0	0.022	97.516	3521moly-5
PO	0.004	40.491	61.651	0.098	0	0.04	102.284	34064moly-1
PO	0.029	38.275	55.335	0	0	0.058	93.697	3513moly-2
PO	0.021	39.747	55.722	0.004	0	0.066	95.56	3513moly-5
PO	0.057	39.425	57.033	0.028	0	0.07	96.613	3521moly-3
PO	0.017	40.206	58.486	0	0	0.082	98.791	3521moly-1
PO	0.034	38.884	56.062	0	0	0.088	95.068	3513moly-6
PO	0.023	37.847	54.812	0.006	0	0.122	92.81	3513moly-3
PO	0.019	40.682	57.187	0.035	0	0.136	98.059	3524moly-3
PO	0	39.81	57.581	0.085	0	0.162	97.638	34064moly-2
PO	0.029	39.935	54.913	0.016	0	0.169	95.062	3513moly-4
PO	0	40.531	55.716	0	0	0.198	96.445	3521moly-10
PO	0.019	40.761	55.542	0.008	0.006	0.261	96.597	3521moly-8
PO	0	40.945	55.367	0	0	0.278	96.59	3521moly-4
PO	0.037	40.512	55.763	0.004	0	0.327	96.643	3521moly-12
PO	0.028	40.527	58.306	0	0	0.365	99.226	3507moly-12
PO	0	39.768	56.176	0	0	0.394	96.338	3521moly-11
PO	0.034	40.004	56.159	0.006	0	0.508	96.711	3521moly-6
PO	0.009	39.621	54.345	0	0	0.517	94.492	3521moly-7
PO	0.082	40.098	58.896	0.018	0	0.548	99.642	3507moly-11
PO	0.012	40.416	56.532	0.01	0	0.587	97.557	3508moly-7
PO	0.062	40.666	57.192	0.003	0	0.645	98.568	7016moly-1
PO	0.03	39.743	56.179	0.007	0	0.831	96.79	3508moly-3
PO	0.018	39.943	55.735	0.011	0	0.867	96.574	3521moly-9
PO	0.003	40.025	56.416	0	0	0.891	97.335	3508moly-5
PO	0	40.142	56.696	0.034	0	1.108	97.98	3508moly-4
PO	0.009	40.454	55.801	0.029	0	1.364	97.657	3508moly-6
PO	0.019	39.242	54.242	0	0	1.379	94.882	7016moly-3
PO	0.022	40.198	54.98	0.004	0	1.649	96.853	3508moly-2
PO	0.027	40.197	56.207	0.007	0	1.654	98.092	7016moly-2
PO	0.054	40.237	60.494	0.015	0	1.687	102.487	3507moly-4
PO	0	39.722	56.5	0	0	1.693	97.915	3508moly-1
PO	0.011	39.524	58.175	0.021	0	1.773	99.504	3507moly-6
PO	0.035	40.34	60.596	0.001	0	1.789	102.761	3507moly-1
PO	0.008	40.183	58.035	0	0	2.507	100.733	3507moly-5
PO	0.009	40.315	55.878	0	0	2.543	98.745	3507moly-10
PO	0.03	40.026	56.662	0	0	3.188	99.906	3507moly-9
PO	0.035	40.108	58.554	0.014	0	3.401	102.112	3507moly-2
PO	0	39.014	58.455	0	0	3.564	101.033	3507moly-13
PO	0.009	39.368	56.588	0.014	0	3.565	99.544	3507moly-8
PO	0.028	40.083	55.931	0	0	3.63	99.672	3507moly-7
PO	0.023	39.418	56.28	0	0	4.47	100.191	3507moly-3
SK	0.014	39.849	56.081	0	0	0.042	95.986	3442moly-3
SK	0	38.214	55.007	0	0	0.085	93.306	3442moly-2
SK	0	40.134	57.294	0.016	0	0.144	97.588	3442moly-5
SK	0	39.809	57.415	0.019	0	0.355	97.598	3442moly-1
SK	0	40.554	56.719	0.004	0	0.573	97.85	3442moly-4
SK	0.025	41.282	55.98	0	0.018	0.026	97.331	3516moly-2
SK	0	40.364	57.494	0.016	0	0.032	97.906	3523moly-3
SK	0.008	38.7	56.885	0.017	0	0.04	95.65	3523moly-4
SK	0	39.616	54.973	0.011	0	0.055	94.655	3516moly-7
SK	0.01	40.174	55.707	0	0	0.055	95.946	3516moly-12
SK	0.015	39.379	58.641	0.021	0	0.057	98.113	340moly-4
SK	0	39.11	55.285	0.015	0	0.065	94.475	3516moly-11
SK	0	39.605	54.977	0	0.042	0.07	94.694	3516moly-3
SK	0.013	38.641	57.731	0.02	0	0.1	96.505	3523moly-1
SK	0.009	40.727	61.124	0.053	0	0.1	102.013	340moly-1
SK	0.032	39.678	57.863	0.022	0	0.125	97.72	3516moly-1
SK	0	40.216	54.661	0.013	0	0.127	95.017	3516moly-10
SK	0.034	39.953	55.86	0	0	0.159	96.006	3516moly-5
SK	0.023	38.294	55.479	0	0.013	0.165	93.974	3516moly-8
SK	0.023	38.939	57.616	0.012	0	0.168	96.758	3523moly-2
SK	0	38.787	55.053	0.027	0	0.186	94.053	340moly-3
SK	0.007	39.128	56.342	0.013	0.008	0.223	95.721	340moly-8
SK	0.001	39.889	52.525	0.006	0	0.256	92.677	3516moly-4
SK	0.019	40.285	57.632	0.041	0	0.389	98.366	340moly-6
SK	0.022	39.928	55.555	0.052	0	0.515	96.072	340moly-7
SK	0	40.193	57.002	0.047	0	0.561	97.803	340moly-5
SK	0	39.939	55.012	0.016	0.003	0.645	95.615	3516moly-6
SK	0	38.396	56.115	0.001	0	0.671	95.183	340moly-2
SK	0.034	39.585	56.009	0	0.048	1.869	97.545	3516moly-9
SK	0.027	38.444	53.295	0.02	0.054	0.177	92.017	3517moly-1

## Sheet: Galena w%
Typ	Se	Pb	Ag	Cu	S	Bi	Total	Sample code - grain nr.
PO	0.704	85.318	0.012	0.02	12.718	0	98.772	30063gal-1
PO	0.738	86.064	0.026	0	12.989	0	99.817	30063gal-2
PO	0.554	83.445	0.346	0.005	13.152	0.122	97.624	30063gal-3
PO	0.072	85.144	0.033	0.007	13.16	0	98.416	30063gal-4
PO	0.094	85.068	0.156	0	13.174	0	98.492	30063gal-5
PO	0.54	83.635	0.253	0.005	13.156	0.103	97.692	30063gal-6
PO	0.511	85.206	0.323	0.007	13.247	0.162	99.456	30063gal-7
PO	0.307	84.664	0.279	0.01	13.332	0.093	98.685	30063gal-8
PO	0.483	83.72	0.214	0	13.197	0	97.614	30063gal-9
CAR	2.138	84.22	0.249	0.017	12.545	0.037	99.206	30064gal-1
CAR	1.382	83.986	0.617	0.195	13.16	0.615	99.955	30064gal-10
CAR	2.629	83.567	0.574	0.38	12.499	0.503	100.152	30064gal-11
PO	0.079	85.918	0.043	0.043	13.427	0	99.51	30064gal-12
PO	0.027	81.997	0	0.06	12.794	0	94.878	30064gal-13
PO	0.228	86.524	0.038	0.09	13.608	0	100.488	30064gal-14
PO	0.302	82.875	0.761	0.287	13.871	0.749	98.845	30064gal-15
PO	0.992	85.367	0.414	0.123	13.105	0.299	100.3	30064gal-16
PO	1.547	83.897	0.547	0.596	12.786	0.411	99.784	30064gal-17
CAR	2.144	84.768	0.244	0	12.707	0	99.863	30064gal-2
CAR	2.143	83.446	0.251	0.011	12.513	0	98.364	30064gal-3
CAR	2.004	82.952	0.54	0.009	12.912	0.506	98.923	30064gal-4
CAR	2.454	82.893	0.236	0	12.555	0	98.138	30064gal-5
CAR	2.054	85.095	0.31	0.008	12.173	0.028	99.668	30064gal-6
CAR	1.499	84.232	0.378	0.101	13.001	0.186	99.397	30064gal-7
CAR	4.075	79.976	0.845	0.056	11.623	0.964	97.539	30064gal-8
PO	0.747	86.593	0.028	0.884	13.006	0	101.258	3506gal-1
PO	0.648	86.022	0.025	0.143	13.26	0	100.098	3506gal-10
PO	0.575	85.851	0.012	0.258	13.18	0	99.876	3506gal-11
PO	1.221	83.781	0.005	0.048	12.839	0	97.894	3506gal-12
PO	0.739	85.438	0	0.012	13.077	0	99.266	3506gal-13
PO	1.005	85.869	0.017	0.511	13.121	0	100.523	3506gal-2
PO	0.002	84.51	0	1.423	13.288	0	99.223	3506gal-3
PO	0.022	86.972	0.004	1.675	13.731	0	102.404	3506gal-4
PO	0.58	86.023	0	0.555	13.207	0	100.365	3506gal-5
PO	1.065	84.664	0	0.933	12.553	0	99.215	3506gal-6
PO	1.149	86.373	0.013	0.938	13.03	0	101.503	3506gal-7
PO	0.516	86.113	0	0.036	13.056	0	99.721	3506gal-8
PO	0.761	85.372	0	0.066	13.138	0	99.337	3506gal-9
PO	0.108	86.831	0	0.013	13.494	0	100.446	3507gal-1
PO	1.127	85.181	0	0.142	12.948	0	99.398	3507gal-2
PO	1.085	83.457	0	0	12.753	0	97.295	3524gal-1
PO	0	86.298	0	0	13.498	0	99.796	35-5gal-1
PO	0	85.893	0	0	13.486	0	99.379	35-5gal-2
PO	0.253	79.485	0.05	0	16.001	0	95.789	35-5gal-3
PO	0.245	69.48	0.028	0	18.679	0	88.432	35-5gal-4
PO	0.226	81.589	0.052	0	15.115	0	96.982	35-5gal-5
PO	0.246	77.648	0.034	0.011	15.247	0	93.186	35-5gal-6
CAR	0.875	82.003	0.771	0.029	13.192	0.848	97.718	6101gal-1
CAR	1.02	83.515	0.827	0.089	13.282	1.051	99.784	6101gal-10
CAR	0.917	84.961	0.78	0.015	13.128	0.836	100.637	6101gal-2
CAR	0.867	82.354	0.75	0.101	12.32	0.787	97.179	6101gal-3
CAR	0.869	83.741	0.835	0.353	13.244	0.973	100.015	6101gal-4
CAR	0.574	82.882	0.887	0.028	13.474	0.941	98.786	6101gal-5
CAR	0.484	81.508	0.808	0.042	13.506	0.938	97.286	6101gal-6
CAR	0.894	83.45	0.783	0	13.203	1.041	99.371	6101gal-7
CAR	1.032	82.525	0.971	0	13.118	1.282	98.928	6101gal-8
CAR	1.011	83.248	0.76	0	13.139	0.856	99.014	6101gal-9
CAR	0.765	82.482	0.181	0.002	13.714	0	97.144	6303gal-2
CAR	0.749	83.822	0.194	0	13.564	0	98.329	6303gal-3
SK	0.954	85.648	0	0	13.145	0	99.747	7001gal-1
SK	0.94	86.018	0	0	12.842	0	99.8	7001gal-2
SK	1.707	85.797	0	0	12.54	0	100.044	7001gal-3
SK	2.131	85.449	0	0.002	12.603	0	100.185	7001gal-4
SK	1.219	87.315	0	0	13.024	0	101.558	7001gal-5
SK	1.349	86.397	0	0	12.941	0	100.687	7001gal-6
SK	0.76	86.853	0	0	12.944	0	100.557	7001gal-7
SK	0.266	85.833	0	0	13.557	0	99.656	7001gal-8
SK	1.097	86.705	0	0	13.195	0	100.997	7001gal-9
SK	1.26	86.129	0.148	0.128	12.294	0.116	100.075	7102gal-1
SK	1.137	84.061	0.142	0.269	13.174	0	98.783	7102gal-2
SK	1.284	86.212	0.144	0.136	12.722	0.182	100.68	7102gal-3
SK	1.394	82.521	0.219	0.328	13.158	0.087	97.707	7102gal-4
SK	1.078	84.461	0.168	0.112	13.045	0.247	99.111	7102gal-5
SK	1.287	84.178	0.224	0.21	13.215	0.063	99.177	7102gal-6
SK	1.353	85.492	0.042	0	13.016	0	99.903	71499gal-1
SK	1.463	85.822	0.056	0	12.381	0	99.722	71499gal-10
SK	1.481	86.541	0.064	0	12.891	0	100.977	71499gal-11
SK	1.458	84.915	0.041	0	12.818	0	99.232	71499gal-2
SK	1.37	84.296	0.067	0	12.908	0	98.641	71499gal-3
SK	1.356	84.294	0.207	0	12.723	0.141	98.721	71499gal-4
SK	1.578	87.253	0.029	0.004	12.747	0	101.611	71499gal-5
SK	1.491	85.257	0.051	0.019	13.112	0	99.93	71499gal-6
SK	1.397	85.692	0.045	0.066	13.087	0	100.287	71499gal-7
SK	1.416	86.009	0.065	0	12.724	0	100.214	71499gal-8
SK	1.436	82.788	0.019	0	13.037	0	97.28	71499gal-9
SK	0.172	86.121	0	0	13.654	0	99.947	7174gal-1
SK	0.301	87.543	0.002	0.03	13.545	0	101.421	7174gal-10
SK	0.218	87.001	0	0.056	13.476	0	100.751	7174gal-11
SK	0.226	84.642	0	0	13.527	0	98.395	7174gal-2
SK	0.231	86.174	0	0	13.761	0	100.166	7174gal-3
SK	0.189	87.403	0	0.002	13.478	0	101.072	7174gal-4
SK	0.229	87.016	0	0.004	13.077	0	100.326	7174gal-5
SK	0.181	87.615	0.031	0.002	13.372	0	101.201	7174gal-6
SK	0.236	87.099	0.003	0	13.681	0	101.019	7174gal-7
SK	0.303	84.854	0.004	0	13.431	0	98.592	7174gal-8
SK	0.23	88.19	0	0	12.487	0	100.907	7174gal-9
PO	0.214	81.138	0.559	0.932	13.766	0.444	97.053	7349gal-1
PO	1.018	73.195	0.033	0.038	17.27	0	91.554	7349gal-2
SK	1.127	84.319	0.391	0	13.098	0.24	99.175	77492gal-1
SK	0.957	85.07	0.359	0.019	13.233	0.196	99.834	77492gal-2
SK	0.914	85.987	0.353	0.004	13.054	0.185	100.497	77492gal-3
SK	0.825	84.951	0.433	0.022	13.187	0.276	99.694	77492gal-4
SK	0.792	85.239	0.42	0.008	13.055	0.245	99.759	77492gal-5
SK	0.852	85.786	0.381	0	13.453	0.235	100.707	77492gal-6
SK	0.85	86.144	0.202	0	13.322	0.093	100.611	77492gal-7
SK	1.044	85.239	0.312	0.018	12.503	0.113	99.229	77492gal-8
CAR	0.307	84.649	0.344	0.002	12.898	0.229	98.429	8701gal-1
CAR	0.107	84.389	0.394	0	13.24	0.295	98.425	8701gal-10
CAR	0.186	84.3	0.369	0	13.609	0.218	98.682	8701gal-11
CAR	0.384	86.638	0.36	0.029	13.504	0.162	101.077	8701gal-12
CAR	0.278	84.683	0.369	0	13.266	0.22	98.816	8701gal-2
CAR	0.059	84.328	0.289	0	13.674	0.025	98.375	8701gal-3
CAR	0.035	85.047	0.25	0	13.241	0.074	98.647	8701gal-4
CAR	0.077	84.411	0.367	0	12.968	0.151	97.974	8701gal-5
CAR	0.133	84.567	0.342	0	13.444	0.234	98.72	8701gal-6
CAR	0.087	84.408	0.384	0	13.547	0.171	98.597	8701gal-7
CAR	0.066	86.347	0.372	0	13.391	0.204	100.38	8701gal-8
CAR	0.121	84.562	0.343	0	13.01	0.226	98.262	8701gal-9

## Sheet: Sphalerite w%
Typ	Ge	S	Zn	Hg	V	Fe	In	Mn	Cu	Cd	Total	Sample code - grain nr.
SK	0	35.7	0.01	0	0.007	2.089	0	47.732	0.047	0	85.585	77492sph-5
SK	0	35.545	0.073	0	0.002	1.857	0	47.954	0.057	0	85.488	77492sph-4
SK	0.008	34.002	39.907	0	0.01	20.249	0	4.475	0.003	0.103	98.757	77492sph-2
SK	0	33.648	40.132	0	0.014	21.531	0	3.834	0	0.077	99.236	77492sph-6
SK	0	33.429	40.27	0	0	20.145	0	4.014	0	0.091	97.949	77492sph-1
SK	0	34.011	41.31	0	0.003	18.818	0	4.791	0	0.093	99.026	77492sph-7
SK	0	33.555	43.247	0	0.009	11.83	0	8.025	0.036	0.216	96.918	77492sph-3
SK	0	33.541	45.548	0	0.002	8.59	0	7.324	4.569	0.257	99.831	7102sph-6
SK	0	33.215	47.882	0	0	9.015	0.023	0.876	7.964	0.174	99.149	7001sph-2
SK	0	33.38	48.487	0	0.002	8.898	0	0.125	7.379	0.211	98.482	7102sph-1
SK	0.013	32.283	48.609	0	0.003	9.469	0	1.868	6.223	0.237	98.705	7001sph-4
SK	0	33.707	48.851	0	0.001	13.893	0	2.522	0.061	0.128	99.163	7001sph-5
SK	0	32.782	48.861	0	0	12.153	0	1.464	3.689	0.159	99.108	7001sph-6
SK	0	33.309	48.861	0	0.004	13.657	0	2.499	0	0.098	98.428	7001sph-7
SK	0	33.293	49.273	0	0	10.493	0	3.949	0	0.153	97.161	7102sph-3
SK	0.023	32.931	49.906	0	0.003	7.1	0	0.412	8.576	0.177	99.128	7001sph-10
CAR	0	32.357	50.325	0	0	7.479	0	0.322	8.571	0.243	99.297	6303sph-2
SK	0	33.377	50.666	0	0	10.91	0	3.817	0	0.22	98.99	7102sph-2
SK	0	33.097	50.973	0	0.016	6.267	0	7.21	0.006	0.29	97.859	7102sph-5
SK	0	32.981	51.208	0	0	6.443	0	5.192	1.458	0.314	97.596	7102sph-4
SK	0	32.799	52.361	0	0.007	7.363	0	0.95	6.364	0.206	100.05	7001sph-8
CAR	0	33.282	54.654	0	0	11.135	0	0.539	0	0.119	99.729	3405sph-6
CAR	0	33.323	54.866	0	0	11.557	0.001	0.563	0	0.147	100.457	3405sph-3
CAR	0.006	33.273	55.701	0	0.006	10.65	0	0.532	0	0.172	100.34	3405sph-4
CAR	0	32.545	55.862	0	0	4.616	0.084	0.356	5.834	0.192	99.489	3440bsph-1
CAR	0	32.891	56.072	0	0	8.925	0	0.39	0	0.174	98.452	3405sph-1
CAR	0	32.715	56.669	0	0.008	9.551	0.027	0.454	0	0.184	99.608	3405sph-2
CAR	0	33.004	58.152	0	0.013	5.159	0	0.379	2.364	0.24	99.311	3405sph-8
SK	0	32.216	59.08	0	0	7.034	0.091	0.292	0	0.187	98.9	3442sph-2
SK	0	32.431	59.174	0	0	7.201	0	0.286	0.06	0.182	99.334	3442sph-1
SK	0	32.79	59.563	0	0.006	7.037	0.055	0.294	0	0.218	99.963	3442sph-3
CAR	0	32.337	59.993	0	0.005	4.108	0.007	0.089	3.578	0.273	100.39	30064sph-3
CAR	0.013	32.48	60.166	0	0	4.822	0.045	0.215	0.012	0.194	97.947	3440bsph-4
PO	0	32.535	61.037	0	0.003	2.579	0.027	0	1.791	0.253	98.225	3506sph-4
CAR	0	32.806	61.054	0	0.012	4.14	0.025	0.208	2.721	0.244	101.21	7174sph-3
CAR	0	33.014	61.71	0	0.002	1.372	0	1.083	1.666	0.327	99.174	6401sph-1
CAR	0	32.825	61.937	0	0	2.424	0.699	0.26	2.002	0.169	100.316	3406sph-3
CAR	0	32.418	62.045	0	0	2.639	0.58	0.284	2.213	0.238	100.417	3406sph-2
PO	0	32.302	62.069	0	0	2.187	0.014	0.651	1.094	0.229	98.546	7349sph-3
CAR	0	32.84	62.098	0	0.008	3.969	0	0.207	0.127	0.245	99.494	3440bsph-3
CAR	0	32.706	62.192	0	0.012	3.355	0.012	0.361	0.423	0.239	99.3	3405sph-11
PO	0	31.715	62.324	0	0.008	0.323	0	0.004	0.071	0.483	94.928	3505sph-3
PO	0	31.023	62.587	0	0	2.101	0.019	0.032	0.06	0.487	96.309	7349sph-1
CAR	0	33.026	62.589	0	0.012	1.564	0	1.075	1.027	0.33	99.623	7174sph-1
CAR	0	33	62.653	0	0.005	2.09	0	0.89	1.849	0.308	100.795	7174sph-2
CAR	0	32.641	62.671	0	0.004	2.102	0	0.542	2.272	0.283	100.515	6303sph-1
SK	0	32.449	62.84	0	0.004	2.301	0.092	0.504	0.829	0.215	99.234	71499sph-4
CAR	0.002	32.449	63.028	0	0.003	3.299	0	0.329	0.236	0.312	99.658	3405sph-7
CAR	0	32.552	63.062	0	0.034	4.084	0	0.19	0.128	0.307	100.357	8701sph-10
PO	0.055	32.188	63.177	0	0	0.239	0	0.001	0.684	0.426	96.77	3505sph-1
PO	0.011	32.661	63.218	0	0	1.641	0	0.088	1.705	0.371	99.695	3506sph-2
SK	0	32.337	63.28	0	0.009	1.732	0	0.634	0.631	0.265	98.888	71499sph-5
SK	0	32.623	63.329	0	0.007	1.493	0	0.769	1.383	0.299	99.903	516sph-2
CAR	0.012	32.252	63.346	0	0	3.682	0.007	0.187	0	0.316	99.802	6401sph-4
CAR	0	32.485	63.363	0	0	2.581	0	0.365	0.219	0.307	99.32	3405sph-5
PO	0	32.249	63.506	0	0.006	2.113	0.024	0.662	0.842	0.237	99.639	7349sph-2
CAR	0	31.783	63.715	0	0	0.863	0	1.116	0.786	0.303	98.566	6401sph-2
PO	0	33.345	63.762	0	0.014	0.225	0.009	0.001	0.162	0.411	97.929	3505sph-4
SK	0	32.591	63.839	0	0	2.242	0	0.924	0	0.261	99.857	7001sph-1
CAR	0	32.324	63.851	0	0	3.272	0.062	0.345	0	0.293	100.147	3405sph-10
PO	0	32.867	63.914	0	0.007	0.152	0	0.002	0.348	0.449	97.739	3505sph-5
PO	0.036	31.784	64.109	0	0	0.237	0	0	0.092	0.215	96.473	3508sph-4
CAR	0	32.931	64.145	0	0	1.36	0	1.003	1.513	0.325	101.277	6401sph-5
PO	0.008	32.251	64.227	0	0.008	0.204	0	0.002	0.086	0.488	97.274	3505sph-6
CAR	0	32.833	64.238	0	0	2.653	0	0.267	0.067	0.294	100.352	3405sph-9
CAR	0	32.615	64.386	0	0.003	1.371	0	0.681	0.839	0.287	100.182	7174sph-6
PO	0	32.767	64.443	0	0.011	1.645	0	0.024	0.832	0.312	100.034	3506sph-3
CAR	0	32.17	64.598	0	0.004	1.283	0.132	0.124	1.097	0.286	99.694	30064sph-5
CAR	0	32.758	64.641	0	0.008	0.882	0	0.248	1.093	0.31	99.94	8701sph-4
PO	0	32.551	64.647	0	0.012	0.14	0	0	0.118	0.396	97.864	3505sph-2
SK	0.034	32.117	64.687	0	0.004	1.281	0	0.334	0.288	0.319	99.064	71499sph-8
SK	0	32.307	64.693	0	0.012	1.577	0	0.909	0.233	0.265	99.996	71499sph-6
CAR	0	32.313	64.709	0	0.006	1.062	0	0.102	1.296	0.261	99.749	30064sph-4
CAR	0	33.271	64.821	0	0.002	1.205	0	0.806	0.618	0.283	101.006	7174sph-7
CAR	0.013	33.064	64.83	0	0.027	0.143	0.026	0.127	0.443	0.41	99.083	8701sph-7
CAR	0.091	32.379	64.878	0	0.026	0.178	0	0.142	0.516	0.319	98.529	8701sph-8
PO	0	32.586	64.881	0	0.012	0.228	0.029	0	0.054	0.196	97.986	3508sph-3
SK	0.029	31.95	64.938	0	0	1.609	0	0.826	0	0.245	99.597	7001sph-9
CAR	0.06	32.611	64.975	0	0.023	0.173	0	0.133	0.518	0.365	98.858	8701sph-12
CAR	0.008	31.845	64.98	0	0.014	1.415	0	0.101	0.469	0.362	99.194	8701sph-6
CAR	0	32.476	64.995	0	0.003	0.951	0	0.825	0.019	0.304	99.573	6401sph-3
SK	0	33.206	65.053	0	0	1.295	0	0.782	0.051	0.316	100.703	71499sph-1
SK	0	32.698	65.096	0	0	1.009	0	0.432	0	0.302	99.537	7001sph-3
CAR	0	32.058	65.154	0	0.004	0.752	0	0.595	0.616	0.308	99.487	6303sph-3
CAR	0	33.065	65.164	0	0.002	0.085	0	0.088	0.092	0.364	98.86	8701sph-9
PO	0	31.296	65.201	0	0	1.135	0	0.061	1.076	0.391	99.16	3506sph-1
CAR	0	29.959	65.205	0	0.002	1.258	0.683	0.17	0.81	0.197	98.284	3406sph-1
SK	0	32.685	65.219	0	0	0.858	0	0.538	0.074	0.307	99.681	71499sph-3
CAR	0	32.708	65.257	0	0.024	0.11	0	0.126	0.411	0.39	99.026	8701sph-11
PO	0	32.061	65.273	0	0	0.183	0	0	0.029	0.154	97.7	3508sph-1
PO	0.014	33.055	65.494	0	0	0.848	0.007	0.175	0.845	0.052	100.49	3506sph-5
SK	0	32.687	65.499	0	0.014	1.292	0	0.784	0.031	0.319	100.626	71499sph-2
CAR	0	32.453	65.5	0	0.007	0.278	0	0.271	0.045	0.358	98.912	8701sph-2
CAR	0	32.836	65.533	0	0.008	1.352	0	0.175	0.038	0.289	100.231	6101sph-3
PO	0.01	32.695	65.641	0	0.01	0.174	0	0.002	0.033	0.174	98.739	3508sph-2
CAR	0	31.809	65.775	0	0.007	1.34	0	0.192	0.014	0.334	99.471	6101sph-2
CAR	0	32.876	65.841	0	0.017	1.433	0.009	0.191	0.036	0.347	100.75	6101sph-4
CAR	0	32.953	65.907	0	0.002	1.219	0	0.171	0	0.343	100.595	6101sph-1
SK	0	32.838	65.935	0	0	1.1	0.025	0.462	0.025	0.318	100.703	71499sph-7
CAR	0	32.686	66.166	0	0.001	0.259	0	0.083	0.205	0.28	99.68	30064sph-1
CAR	0	32.74	66.181	0	0	0.953	0	0.075	0.029	0.228	100.206	30064sph-2
SK	0	32.599	66.272	0	0.016	0.427	0.003	0.326	0.041	0.291	99.975	516sph-4
SK	0	32.904	66.305	0	0.007	0.444	0	0.489	0.028	0.337	100.514	516sph-1
CAR	0	32.352	66.516	0	0.012	0.277	0	0.263	0	0.357	99.777	8701cpydt-7
CAR	0	32.727	66.588	0	0.002	0.306	0	0.38	0.176	0.332	100.511	8701sph-5
CAR	0	32.69	66.803	0	0.007	0.241	0	0.357	0	0.291	100.389	8701sph-3
SK	0	32.903	66.948	0	0.018	0.362	0	0.315	0	0.277	100.823	516sph-3

## Sheet: Kesterite w%
No.	Se	S	Zn	In	V	Fe	Cu	Sn	Total	Sample code - grain nr.
1	0.127	30.291	12.704	0.531	0.01	2.204	30.34	26.142	102.364	3440bkes-1
2	0.103	30.006	7.221	0.27	2.728	0.957	39.208	19.993	100.486	3440bkes-2
3	0.188	29.584	12.487	0.49	0.021	1.984	29.514	25.68	99.948	3440bkes-3
4	0.126	30.006	8.134	0.196	2.707	0.771	39.239	19.689	100.868	3440bkes-4
5	0.103	29.521	12.895	0.514	0.007	2.469	30.186	25.7	101.404	3440bkes-5
9	0.19	30.121	14.431	0.633	0.007	2.652	29.57	24.039	101.636	3440bkes-9
10	0.203	29.812	12.289	0.487	0.007	2.131	30.707	25.869	101.505	3440bkes-10
12	0.182	29.682	11.233	0.423	0.026	4.377	29.479	25.49	100.938	3440bkes-12
14	0.233	29.423	0.01	0.13	0.054	15.608	40.969	13.26	99.677	30063kes-1
15	0.19	30.004	0.01	0.173	1.046	9.974	42.227	16.64	100.254	30063kes-2
17	0.14	30.856	0.148	0.226	0.007	15.161	28.205	25.377	100.113	30063kes-4
19	0.16	31.378	0.01	0.243	0.007	14.933	38.08	18.364	103.158	30063kes-6
20	0.16	30.166	6.433	0.177	2.991	0.983	40.475	19.415	100.802	3407kes-1
21	0.092	29.941	5.887	0.315	3.114	0.583	40.655	18.959	99.546	3407kes-2
24	0.186	30.144	14.035	0.504	0.023	1.476	29.728	25.795	101.897	3407kes-5
25	0.164	26.854	7.268	0.278	2.571	0.736	39.208	16.52	93.599	3407kes-6
26	0.22	29.68	13.858	0.543	0.038	1.889	29.342	26.42	101.999	3407kes-7
27	0.152	28.832	8.513	0.369	2.449	1.328	37.847	19.5	98.99	3407kes-8

## Sheet: Sulfosalt w%
Type	Se	Pb	Ag	Cu	S	Bi	Te	Sb	Total	Sample code - grain nr.
CAR	0.779	85.464	0.108	0.077	13.252	0.637	0	0	100.317	6303sul-7
CAR	0.835	85.427	0.124	0.015	13.376	0.754	0.056	0	100.587	6303sul-3
CAR	0.934	81.102	0.813	0.495	13.07	2.171	0.024	0	98.609	6101sul-10
CAR	1.449	54.496	0.737	0.282	14.861	24.663	0.081	0	96.569	3406sul-9
CAR	0.299	44.331	0.972	0.08	17	35.873	0	0	98.555	3405sul-5
CAR	0.396	44.095	1.027	0.105	16.276	37.555	0.093	0	99.547	3405sul-8
CAR	0.265	37.635	0	9.993	16.899	35.682	0	0.031	100.505	6303sul-8
CAR	0.432	36.107	0.014	11.282	16.902	36.974	0.04	0	101.751	6101sul-2
CAR	0.147	35.797	0	10.977	17.162	36.207	0	0	100.29	30063sul-1
CAR	0.177	35.743	0	11.743	17.207	35.966	0	0	100.836	30064sul-6
CAR	1.172	35.664	0	10.816	16.276	35.672	0.007	0	99.607	30064sul-5
CAR	0.312	35.43	0	10.696	16.891	36.584	0	0	99.913	6101sul-3
CAR	0.168	34.942	0	10.519	17.325	36.891	0	0	99.845	6101sul-4
CAR	0.234	34.901	0	10.416	16.903	36.728	0	0	99.182	6303sul-1
CAR	0.234	34.306	0	10.754	17.071	38.263	0.003	0	100.631	6101sul-5
CAR	0.344	34.292	0.062	10.708	16.821	37.337	0.058	0	99.622	6101sul-1
CAR	0.264	34.275	0	10.74	16.663	36.008	0.022	0	97.972	6303sul-4
CAR	0.756	34.257	0	9.811	16.467	37.809	0	0	99.1	6303sul-9
CAR	0.295	33.882	0	11.186	16.878	38.629	0	0	100.87	6101sul-7
CAR	0.487	33.857	0	10.309	17.127	37.906	0	0	99.686	6303sul-6
CAR	0.447	33.553	0.345	0.051	17.721	43.137	0.064	0	95.318	3405sul-4
CAR	0.271	33.435	0	11.359	17.144	38.441	0	0	100.65	6101sul-9
CAR	0.384	33.394	0.473	0.114	17.313	47.104	0.174	0	98.956	3405sul-7
CAR	0.233	33.35	0	10.41	16.996	39.546	0	0	100.535	3406sul-12
CAR	0.257	33.169	0	10.749	16.188	38.58	0	0	98.943	6101sul-8
CAR	0.443	32.69	0	11.115	16.874	39.313	0	0	100.435	6101sul-6
CAR	0.419	32.6	0.59	0.058	18.683	42.988	0.215	0	95.553	3405sul-1
CAR	0.456	31.512	0.753	0.116	17.153	45.936	0.242	0.017	96.185	3405sul-6
CAR	0.498	31.023	0.478	0.182	19.135	42.825	0.1	0	94.241	3405sul-2
CAR	0.511	29.466	0.584	0.16	19.044	43.818	0.061	0	93.644	3405sul-3
CAR	0.631	29.152	0	8.986	16.79	44.119	0	0	99.678	6303sul-5
CAR	0.463	27.858	0	8.66	17.249	46.427	0	0	100.657	3406sul-14
SK	0.541	27.586	0	8.576	17.271	45.441	0	0.005	99.42	3523sul-1
CAR	0.432	27.264	0.019	8.675	17.361	46.516	0	0	100.267	3406sul-13
CAR	0.58	26.744	0	8.394	17.448	46.814	0	0	99.98	3406sul-10
CAR	0.545	25.604	0	7.983	17.563	49.454	0	0	101.149	3406sul-11
CAR	0.637	23.002	0	7.024	18.213	48.85	0.019	0	97.745	6303sul-2
CAR	0.387	19.693	0.462	6.067	17.966	56.803	0.029	0.034	101.441	30064sul-3
PO	0.333	18.503	0.159	3.022	19.506	53.849	0.109	0.005	95.486	3442sul-4
CAR	0.631	18.449	0.662	5.426	17.482	56.912	0	0.007	99.569	30064sul-1
CAR	0.293	15.528	1.693	9.691	18.235	54.238	0.241	0	99.919	3407sul-3
CAR	0.488	14.591	3.681	8.923	17.644	54.447	0	0	99.774	30064sul-4
CAR	0.335	14.051	1.275	13.506	17.591	45.648	0	0	92.406	3407sul-1
CAR	0.16	9.501	1.237	18.835	21.101	44.012	0.033	0	94.879	3407sul-2
PO	1.002	5.867	1.144	7.046	18.725	63.338	0.374	0	97.496	3442sul-3
CAR	0.71	5.397	0.037	0.006	6.404	52.865	31.67	0	97.26	6303sul-11
SK	1.303	3.114	12.659	0.421	17.885	61.21	0.303	0	96.895	34043sul-7
SK	0.664	2.126	0.013	0.77	18.762	76.535	0	0	98.87	34043sul-8
CAR	0.169	2.012	1.086	13.44	19.537	64.154	0	0	100.398	30064sul-2
CAR	0.307	1.591	0	0.689	18.454	77.821	0	0	98.862	3406sul-2
CAR	0.233	1.402	0.01	0.899	18.813	77.462	0	0	98.819	3406sul-3
CAR	0.362	0.837	0	0.398	19.067	78.549	0	0	99.213	3406sul-1
CAR	0.632	0.728	0	0.384	18.446	79.635	0	0	99.825	3406sul-4
SK	0.977	0.417	9.069	1.039	17.075	68.731	0.209	0	97.517	34043sul-6
CAR	1.772	0.093	0.041	0.025	4.863	58.149	33.106	0	98.201	6303sul-10
SK	0.433	0.093	0.02	2.175	3.629	56.216	32.893	0	95.661	34043sul-9
SK	2.352	0.089	8.861	1.639	16.514	69.839	0	0	99.294	34043sul-15
CAR	2.486	0.012	0.014	0.127	5.304	57.067	29.389	0	94.541	3406sul-5
CAR	1.48	0	0.041	14.359	19.027	63.746	0	0	98.653	3407sul-1
CAR	1.588	0	0.081	14.674	19.055	64.148	0	0	99.546	3407sul-2
CAR	1.534	0	0.025	13.919	19.128	63.863	0	0	98.469	3407sul-3
CAR	1.611	0	0.034	13.621	19.184	63.973	0	0	98.423	3407sul-4
CAR	1.427	0	0.035	13.241	19.297	61.016	0	0	95.016	3407sul-5
CAR	0.268	0	0.042	0.104	7.235	52.8	30.445	0	91.05	3407sul-6
CAR	2.614	0	0.004	0.139	4.799	55.954	25.071	0	88.712	3406sul-6
CAR	1.177	0	0.059	0.145	5.729	55.498	32.49	0	95.259	3406sul-7
PO	0.721	0	0.153	6.515	19.468	72.696	0.069	0	99.622	3442sul-1
CAR	1.249	0	0.013	0	7.007	56.101	32.698	0	97.227	3406sul-8
PO	0.241	0	0	0	6.097	56.199	33.393	0	96.134	3442sul-2
PO	0.545	0	0.312	6.788	19.032	73.117	0.2	0	99.994	3442sul-5
PO	0.855	0	0.009	0.103	8.125	52.686	31.684	0	93.627	3442sul-6
PO	0.881	0	0.007	15.957	19.461	62.412	0	0	98.718	3442sul-7
SK	0.27	0	0.018	35.06	18.736	40.562	0	0.004	94.65	3444sul-1
SK	1.168	0	0.077	0.359	5.906	56.362	33.528	0	97.532	3444sul-2
SK	2.439	0	0.004	0.173	6.587	56.246	30.436	0	96.002	3444sul-3
SK	9.765	0	17.748	5.927	20.376	33.322	0.61	0	87.748	34043sul-1
SK	8.031	0	14.902	9.744	24.408	27.457	0.518	0	85.06	34043sul-2
SK	1.062	0	0.024	0.096	9.53	53.058	29.627	0	93.559	34043sul-3
SK	0.907	0	0.029	0.022	4.703	58.721	34.191	0	98.766	34043sul-4
SK	1.071	0	0.025	0	5.932	58.346	32.922	0	98.436	34043sul-5
SK	0.774	0	0	0.102	17.815	78.735	0.086	0	97.512	34043sul-10
SK	0.833	0	0	0.118	18.489	80.166	0	0	99.606	34043sul-11
SK	2.117	0	9.913	0.991	16.483	69.258	0.042	0	98.804	34043sul-12
SK	0.861	0	9.693	1.075	17.751	70.148	0.266	0	99.794	34043sul-13
SK	0.932	0	27.201	0.146	17.022	54.365	0.274	0	99.94	34043sul-14
SK	3.773	0	0.539	0	4.785	50.497	33.283	0	93.059	34043sul-16
SK	1.24	0	0.206	0.013	7.346	48.998	34.775	0	92.718	34043sul-17
SK	1.032	0	0.051	0.131	9.093	57.773	29.929	0	98.162	34043sul-18

## Sheet: Tetrahedrite-group minerals w%
No.	As	Te	Cu	Ag	Se	Pb	Fe	Hg	Bi	Zn	Cd	Sb	S	Total	Sample code - grain nr.
CAR	1.854	0	38.179	0.674	0	0	0.263	0	0.199	9.305	0.077	27.774	25.2	103.525	8703fhl-5
CAR	2.795	0	37.662	0.616	0.047	0	0.331	0.077	0.333	9.041	0.06	25.542	25.219	101.723	8703fhl-7
CAR	3.236	0	38.194	0.221	0	0	0.306	0.037	0	7.752	0.123	25.333	26.019	101.221	6401fhl3
CAR	3.335	0	39.648	0.183	0.045	0	0.341	0	0	7.558	0.097	25.572	25.732	102.511	6401fhl-1
PO	3.431	0	38.331	0.67	0	0	0.992	0	0.437	7.777	0.081	24.833	25.021	101.573	8703fhl-6
CAR	3.514	0	40.674	0.179	0	0	0.375	0	0	7.308	0.131	25.199	26.331	103.711	6401fhl1
CAR	3.618	0	38.665	0.181	0.021	0	0.232	0	1.202	7.609	0.05	23.799	25.114	100.491	6401fhl-9
CAR	3.632	0	38.537	0.099	0	0	1.923	0	0	6.874	0.033	24.505	24.987	100.59	3440bfhl-3
CAR	3.826	0	37.323	0.213	0.029	0	0.244	0	0.263	9.603	0.089	23.79	25.677	101.057	6401fhl-6
CAR	4.079	0	38.278	0.199	0.019	0	0.297	0	0	10.057	0.074	24.413	25.347	102.763	6401fhl-4
CAR	4.535	0	35.045	0.118	0.057	0	5.071	0	0	6.412	0.063	22.266	25.459	99.026	3440bfhl-1
CAR	4.789	0	38.815	0.282	0	0	1.252	0	2.732	7.567	0.113	19.164	25.538	100.252	6401fhl-12
CAR	5.065	0	39.225	0.541	0	0	0.223	0.046	0.255	8.406	0.094	22.335	25.67	101.86	8703fhl-4
CAR	5.817	0	38.674	0.479	0.039	0	0.331	0.003	0.48	8.541	0.095	20.989	25.811	101.259	8703fhl-3
CAR	6.871	0	39.884	0.114	0	0	0.41	0	0.172	8.315	0.111	19.522	26.05	101.449	6401fhl-2
CAR	7.981	0	39.27	0.147	0	0	1.766	0	0.326	6.638	0.019	18.288	25.689	100.124	3440bfhl-4
CAR	8.185	0	39.158	0.161	0.024	0	0.373	0	1.762	7.65	0.112	16.878	26.046	100.349	6401fhl-10
CAR	8.435	0	38.791	0.148	0	0	0.309	0	0.166	9.956	0.085	17.893	26.489	102.272	6401fhl-7
CAR	8.441	0	38.255	0.399	0	0	0.42	0.019	0.414	9.516	0.086	17.444	26.402	101.396	8703fhl-2
PO	9.474	0	37.278	0.049	0.007	0	1.955	0	2.183	7.175	0	4.871	27.226	90.218	3440bfhl-5
CAR	9.937	0	42.149	0.066	0	0	0.859	0.092	0	7.07	0.156	14.525	27.054	101.908	3508fhl6
PO	10.413	0.055	39.835	0.143	0	0	0.521	0	2.17	9.379	0.092	13.21	25.998	101.816	6401fhl-5
CAR	10.485	0	41.178	0.043	0	0	0.78	0.122	0	7.683	0.175	14.857	26.936	102.259	3508fhl-3
CAR	10.647	0	40.522	0.132	0	0	0.487	0.021	1.663	7.43	0.101	12.992	26.265	100.26	6401fhl-8
CAR	10.665	0.098	41.027	0.328	0	0	0.328	0.015	1.336	8.399	0.079	12.993	26.292	101.56	8703fhl-1
PO	11	0	42.751	0.075	0.001	0	0.781	0.178	0	7.593	0.127	14.396	26.323	103.225	3508fhl7
PO	11.224	0	39.834	0.083	0.004	0	0.446	0.073	0	7.637	0.187	13.978	26.679	100.145	3508fhl-13
PO	11.55	0	41.017	0.049	0	0	0.568	0.137	0	7.638	0.182	10.932	27.421	99.494	3508fhl-2
PO	12.104	0	40.539	0.107	0	0	0.553	0.076	0	7.399	0.255	12.499	27.165	100.697	3508fhl-9
PO	12.109	0	41.083	0.077	0.018	0	0.594	0.05	0	7.67	0.204	12.052	26.684	100.541	3508fhl-6
PO	12.688	0	40.627	0.178	0.033	0	1.245	0	1.986	7.653	0.107	9.487	26.642	100.646	6401fhl-11
CAR	12.72	0	40.576	0.055	0	0	0.604	0	0	7.508	0.13	11.043	27.421	100.057	3508fhl-8
PO	13.855	0	40.774	0.047	0	0	1.342	0.081	0	7.543	0.164	9.904	26.242	99.952	3508fhl-5
CAR	15.623	0	42.637	0.064	0	0	0.776	0.018	0.077	8.893	0.129	6.347	28.551	103.115	6401fhl2
CAR	15.896	0	40.688	0.045	0	0	0.79	0	0.174	8.677	0.134	6.103	27.937	100.444	6401fhl-3
CAR	16.688	0	41.196	0.023	0	0	2.575	0.157	0.873	7.474	0.054	4.139	28.288	101.467	6303fhl-6
PO	16.89	1.676	41.78	0.038	0	0	4.874	0	3.86	3.3	0.036	0.297	27.636	100.387	34042fhl-1
SK	16.966	0	42.802	0.066	0	0	1.784	0	0	6.711	0.081	5.021	27.709	101.14	3508fhl-11
CAR	17.193	0.419	40.937	0.19	0	0	4.46	0	2.077	5.227	0	1.789	27.898	100.19	3407fhl-2
PO	17.62	0	42.922	0.034	0	0	1.687	0.078	0	7.24	0.171	1.247	28.495	99.494	3508fhl5
PO	17.651	0	41.877	0.031	0	0	0.801	0.159	0.848	8.389	0.116	2.178	27.124	99.174	6303fhl-3
CAR	17.876	0.01	40.709	0.021	0	0	2.831	0.176	0.173	7.367	0.113	3.623	27.408	100.307	6303fhl-4
CAR	18.028	0	43.146	0.058	0	0	2.263	0	0	6.213	0.106	3.311	28.147	101.272	3508fhl-10
PO	18.551	0.116	41.704	0.207	0	0	4.31	0	1.835	5.236	0.039	1.367	27.733	101.098	3407fhl-1
SK	18.557	0.136	42.337	0.035	0	0	4.744	0	0.336	3.809	0.04	0.724	28.437	99.155	34042fhl-6
CAR	18.652	0	43.941	0.032	0	0	1.74	0.069	0	7.317	0.141	1.153	29.271	102.316	3508fhl4
PO	19.055	0	41.737	0.103	0	0	2.624	0	0	7.449	0.053	0.09	29.066	100.177	30063fhl-2
PO	19.26	0.016	43.313	0.041	0	0	1.853	0	0	6.628	0.114	1.554	28.191	100.97	3508fhl-12
SK	19.267	0	42.593	0.035	0	0	1.674	0	0	6.731	0.062	2.401	28.131	100.894	3508fhl-7
PO	19.298	0	41.979	0.027	0.019	0	5.111	0	0.293	4.059	0.004	0.259	28.505	99.554	34042fhl-9
PO	19.479	0.007	41.267	0.052	0	0	4.284	0	0.688	4.994	0.037	1.077	27.075	98.96	3440bfhl-2
SK	19.49	0	40.684	0.084	0	0	2.184	0.023	0.084	6.358	0.233	2.385	27.243	98.768	3507fhl-1
SK	19.561	0	42.403	0	0	0	4.492	0	0.083	4.235	0.011	0.848	28.163	99.796	34042fhl-11
PO	19.57	0	42.514	0.022	0	0	1.639	0.035	0	7.19	0.13	1.144	28.588	100.832	3508fhl-4
CAR	19.635	0	40.406	0.037	0	0	6.275	0	0.121	3.974	0	0.819	28.098	99.365	34042fhl-5
PO	19.81	0	42.106	0.014	0	0	0.916	0.111	0	9.186	0.077	0.607	28.012	100.839	6303fhl-2
SK	19.855	0	42.115	0.012	0	0	6.859	0.019	0.019	0.631	0.055	0.005	28.405	97.975	34046fhl-4
PO	19.902	0	43.148	0.044	0	0	2.396	0	0	6.087	0.061	0.227	28.669	100.534	3508fhl-1
SK	19.936	0	41.784	0.013	0	0	5.6	0	0.325	3.86	0.042	0.182	28.369	100.111	34042fhl-2
CAR	19.968	0	42.445	0.005	0	0	4.189	0	0	4.029	0.013	0.065	28.67	99.384	34042fhl-3
SK	19.98	0	42.488	0.021	0	0	6.998	0.075	0.021	0.552	0	0.148	28.109	98.392	34046fhl-3
SK	20.028	0.022	43.846	0.012	0	0	6.831	0	0	0.735	0.033	0.13	28.399	100.036	34046fhl-5
PO	20.05	0	42.312	0.153	0	0	2.905	0	0	5.231	0.07	0.216	28.862	99.799	30063fhl-3
PO	20.083	0	43.87	0.021	0	0	6.921	0.002	0.021	0.622	0.005	0.065	28.651	100.261	34046fhl-9
PO	20.1	0.004	41.746	0.03	0	0	5.886	0	0	4.059	0	0.334	28.48	100.639	34042fhl-12
PO	20.184	0	43.067	0.04	0	0	7.058	0.032	0	0.63	0	0.069	28.746	99.826	34046fhl-2
PO	20.234	0	42.295	0.031	0	0	1.054	0.042	0.123	8.937	0.09	0.228	28.377	101.411	6303fhl-1
PO	20.273	0	42.514	0.042	0	0	4.907	0	0.036	4.127	0.001	0.518	28.8	101.218	34042fhl-8
CAR	20.286	0	44.106	0.01	0.01	0	6.814	0.086	0	0.694	0	0.028	28.579	100.613	34046fhl-7
CAR	20.35	0	42.212	0.033	0.02	0	5.102	0	0.174	3.836	0.033	0.095	28.505	100.36	34042fhl-10
PO	20.459	0	43.704	0	0	0	7.052	0	0	0.592	0	0.238	28.092	100.137	34046fhl-1
SK	20.556	0	42.063	0.033	0	0	6.078	0	0	3.993	0.06	0.019	28.565	101.367	34042fhl-14
SK	20.666	0	44.265	0.001	0	0	6.844	0.032	0	0.825	0	0	29.357	101.99	34046fhl-6
PO	20.711	0	42.771	0.028	0	0	4.341	0	0.196	4.186	0.002	0.156	28.435	100.826	34042fhl-13
PO	20.744	0	43.386	0.022	0	0	6.727	0.089	0	0.57	0.046	0.113	28.861	100.558	34046fhl-8
SK	20.78	0	41.453	0.111	0	0	1.75	0	0	7.319	0.099	0.033	27.676	99.221	30063fhl-1
SK	20.826	0	43.046	0.028	0	0	4.465	0	0	4.003	0.04	0.049	28.131	100.588	34042fhl-7
SK	20.943	0	42.279	0.025	0	0	5.505	0	0.053	3.937	0.018	0.108	27.885	100.753	34042fhl-15
PO	20.994	0	40.408	0.03	0	0	4.91	0.097	1.253	7.387	0.09	0.388	29.713	105.27	6303fhl-5

## Sheet: Sample list and data
Drillcore	Spl. nr.	Coordinates (WGS 84)			Mineralogy		Mineralization type	Rock name
		X	Y	Z	Ore minerals	Gangue minerals
Rm-30	63	47.9349	20.0694	-290.29	py, cpy, fh, ga, sphs	fs, qz, ag,	PO	diorite porphyry stockwork
Rm-30	64	47.9349	20.0694	-400.59	py, ga, sph, sphs, mo	qz, fs, ag, cc, dol	PO-CAR	diorite porphyry stockwork with polimetallic carbonate vein
Rm-34	05	47.9373	20.0615	-602.28	py, sph, ga,cpy, sphs	qz, cc	CAR	chert with polimetallic carbonate veins
Rm-34	06	47.9373	20.0615	-697.28	py, sph, sphs, fhl	qz, cc	CAR	polimetallic carbonate vein
Rm-34	07	47.9373	20.0615	-716.28	py, mo, sch, sph, fhl, sphs	dol, qz,	CAR	hydrothermally altered carbonate breccia
Rm-34	42	47.9373	20.0615	-796.28	py, sph, cpy, fhl, sphs, sch, mo	qz, grt	SK	qz-grt skarn
Rm-34	43	47.9373	20.0615	-818.28	py, sphs, sch, cpy	qz	SK	contact quartzite
Rm-34	44	47.9373	20.0615	-832.78	py, sphs, sch, cpy	fs, qz, ag	PO	diorite porphyry stockwork
Rm-34	46	47.9373	20.0615	-961.28	py, fhl, sphs	fs, qz, ag	PO	porphyry diorite with disseminted sulfides
Rm-35	5	47.9359	20.0658	-337.79	py, cpy, sph, ga, sphs	fs, qz, ag	PO	diorite with disseminated sulfides
Rm-35	6	47.9359	20.0658	-334.29	py, cpy, sph, ga	fs, qz, ag	PO	diorite porphyry stockwork
Rm-35	7	47.9359	20.0658	-373.79	py, mo, cpy, ga, fhl	fs, qz, ag, cc	PO	diorite porphyry stockwork
Rm-35	8	47.9359	20.0658	-372.79	py, mo, fhl, sph,	fs, qz, ag, cc	PO	diorite porphyry stockwork
Rm-35	13	47.9359	20.0658	-569.29	py, mo, cpy	fs, qz, ag, cc	PO	diorite porphyry stockwork
Rm-35	16	47.9359	20.0658	-677.29	py, mo, cpy	fs, qz, ag, cc	PO	diorite porphyry stockwork	diorite porphyry stockwerk
Rm-35	17	47.9359	20.0658	-682.79	py, mo	fs, qz, ag	PO	qz-diorite	qz-diorite
Rm-35	21	47.9359	20.0658	-782.29	py, mo	fs, qz, ag	PO	diorite porphyry stockwork
Rm-35	23	47.9359	20.0658	-786.29	py, mo, cpy, sphs	qz, grt, px	PO	diorite porphyry stockwork
Rm-35	24	47.9359	20.0658	-837.29	py, mo, cpy	fs, qz, ag	PO	diorite porphyry stockwork
Rm-45	340	47.9329	20.0709	-839.29	py, cpy, mo,	qz, amf,grt	SK	amfibole-garnet-skarn
Rm-61	01	47.942	20.0625	-664.47	py, sph, cpy, ga,sphs	qz, cc, dol, fl	CAR	hydrothermally altered limestone breccia with polimetallic vein
Rm-63	03	47.9324	20.0604	-506.29	py, ga, sph, sphs	cc	CAR	massive pyrite lens
Rm-64	01	47.92801	20.06202	-232.98	py, sph, ga, fhl, sphs	qz, cc, dol	CAR	hydrothermally altered limestone breccia
Rm-70	01	47.9203	20.0698	-576.92	py, sph, ga, cpy	cc, px, ag	SK	polimetallic carbonate vein from skarn
Rm-70	16	47.9203	20.0698	-313.32	py, cpy, mo, ga	fs, qz, ag	PO	diorite porphyry stockwork
Rm-71	74	47.9172	20.058	-926.9	py, cpy, ga, sph, sphs	cc, qz, anh	SK	masssive crystalline polimetallic skarn
Rm-71	499	47.9172	20.058	-907	py, sph, ga, cpy, sphs	grt, qz, px, cc	SK	garnet skarn with polimetallic veins
Rm-71	02	47.9203	20.0698	-717.92	py, sph, ga, cpy	px, ep, srp, cc	SK	green skarn with polimetallic veins
Rm-73	49	47.9186	20.0631	-58.31	py, cpy, mo, sph, ga, sphs	fs, qz, ag	PO	diorite porphyry stockwork
Rm-77	492	47.92569	20.06332	-219.33	py, po, mt, sph, ga, to, va, ala	grt, anh, br	SK	brucite-garnet-magnetite-sulfide skarn
Rm-82	516	47.9021	20.0513	-645.2	py, sph, ga, cpy	anh	SK	polimetallic anhydrite vein
Rm-87	01	47.9368	20.0557	-422.27	py, sph, ga, fhl, cpy	qz, cc	CAR	hydrothermally altered limestone breccia
